# Supplementary material
Source: publisher figshare collection journal article supplement (https://aacr.figshare.com/articles/dataset/_/22367621)
Supplement: Supplementary file 1 [file 39812693]

## SUPPLEMENTARY INFORMATION

### “Small Interfering RNA (siRNA)-Directed Reversal of uPA Demethylation Inhibits Prostate Tumor Growth and Metastasis”

Sai MuraliKrishna Pulukuri,<sup>1</sup> and Jasti S. Rao<sup>1,2 \*</sup>

#### SUPPLEMENTAL FIGURE LEGENDS

**Supplemental Figure S1. The combination of uPA siRNA did not induce DNA methylation within the *14-3-3 $\sigma$*  promoter in PC3 cells.** PC3 cells were transfected with either control siRNA (siMM) or siRNA directed against the *uPA* gene promoter (siuPA). The methylation status of the CpG sites within the *14-3-3 $\sigma$*  promoter was determined by bisulfite sequencing.

**Supplemental Figure S2. Effect of single siRNA targeting the *uPA* gene promoter on uPA mRNA (*top*) and protein expression (*bottom*).** PC3 cells were transfected with mock, siMM or uPA siRNA. mRNA and protein expression of uPA and GAPDH were monitored by RT-PCR and immunoblot analysis, respectively. The number under each band is expressed as a percentage of Lipofectamine control (mock), normalized by the corresponding GAPDH level. MM, mismatched oligonucleotides.

**Supplemental Figure S3. siRNA targeting the *uPA* promoter induced transcriptional silencing in PC3 prostate cancer cells. (A).** Nuclear run-on assays of uPA transcription were carried out using nuclei from siRNA-transfected and mock cells as described in Methods. Specific hybridization to uPA was quantified using a PhosphorImager and was normalized to that of GAPDH. **(B)** Expression levels of *uPA* mRNA was determined by real-time RT-PCR. PC3 cells were transfected with mock, siMM or siuPA in the presence or absence of 5-aza and TSA. Results shown are the means  $\pm$  SD of three independent experiments ( $p < 0.01$ ).

**Supplemental Figure S4. siRNA targeting the *uPA* promoter induced DNA methylation in DU145 prostate cancer cells. (A)** Bisulfite-based DNA methylation analysis using quantitative real-time PCR in DU145 cells. The PCR product amplified with methylation-insensitive primers was used for normalization. **(B)** Bisulfite sequencing analysis of the CpG island in the *uPA* promoter in mock-transfected cells and in cells transfected with siuPA or siMM.

**Supplemental Figure S5. uPA silencing suppressed invasion and angiogenesis in DU145 prostate cancer cells. (A)** The invasive capacity of cells transfected with mock, siMM or siuPA were assessed *in vitro* by matrigel invasion assay. **(B)** The representative number of invading cells through the matrigel was counted under the microscope in five random fields ( $p < 0.01$ ). **(C)** Angiogenic activity of cells transfected with mock, siMM or siuPA were determined by EC tube-like formation assay. Data are mean  $\pm$  SD three independent experiments ( $p < 0.01$ ).

### Supplementary Table 1

| Sequence Name               | Sequence (5'-3')                                                                            |
|-----------------------------|---------------------------------------------------------------------------------------------|
| uPA siRNA-1                 | GCA CGG AGA ATT TAC AAG CCT                                                                 |
| uPA siRNA-2                 | TCT TTG TGA GCG TTG CGG AAG                                                                 |
| uPA siRNA-3                 | GCA CGC GGG GTC CGG GTC GCT                                                                 |
| uPA siRNA-4                 | AGG GGC GGC GCC GGG GCG GGC                                                                 |
|                             |                                                                                             |
| uPA siRNA-1 with mismatches | <u>G</u> G <u>A</u> CGG <u>A</u> C <u>A</u> ATT TAG AAG <u>G</u> C <u>T</u>                 |
| uPA siRNA-2 with mismatches | <u>T</u> G <u>T</u> TTG <u>T</u> C <u>A</u> <u>G</u> G <u>G</u> TTG <u>G</u> G <u>G</u> AAG |
| uPA siRNA-3 with mismatches | GCA <u>G</u> G <u>C</u> <u>G</u> G <u>C</u> <u>G</u> T <u>G</u> CGG <u>G</u> T <u>G</u> GCT |
| uPA siRNA-4 with mismatches | AGG <u>G</u> G <u>G</u> <u>G</u> G <u>G</u> <u>G</u> C <u>G</u> GGG <u>G</u> G <u>G</u> GGC |

Mismatched bases in uPA siRNA1-4 are underlined.
